# Supplementary material for: Comparative Genomics Reveals a Convergent Signature on the Vitamin D Receptor (VDR) in Herbivorous Mammals
Source: Research Square preprint supplement (doi:10.21203/rs.3.rs-483507/v1), 2021-05-11
Supplement: Supplementary file 1 [file 1a6d6207cb36543f1ac78cc4.xlsx]

## Sheet: 122genes of 100+ mammals
		Gene	ACOX1	EPO	EPO	EPO	ASB13	ERC1	BCKDK	FBXO48	HSDL1	ARMC5	ARID3B	FRMPD1	ENO2	ADAD1	POU2AF1	PPARD	HTATIP2	CCDC77	SYT13	APBA2	DENND6A	DNAJC3	KIAA0513	EPHA5	RHPN1	TEX264	TACR2	TACR2	ANXA4	RNF157	REEP3	CCL28	ZZZ3	SLC44A1	SLC44A1	SLC44A1	INPPL1	IDNK	DCLK3	MICU3	RASGRF1	USP44	GFPT2	MANEA	FBN2	OPRK1	NUDT14
		Site （14 mammals）	[17] M	[3] F	[72] L	[99] C	[48] V	[44] M	[24] R	[51] A	[253] A	[363] I	[143] A	[358] C	[74] V	[301] D	[44] T	[45] Q	[56] L	[92] S	[204] V	[132] T	[141] Y	[238] R	[205] T	[89] N	[59] S	[34] T	[16] D	[61] Q	[177] D	[483] E	[164] E	[81] R	[322] T	[465] V	[465] V	[466] G	[38] S	[92] L	[21] G	[7] V	[290] S	[103] N	[327] K	[312] R	[453] L	[236] V	[54] T
Taxa	Family	Site （OrthologuesV10B）	236	20	90	117	65	80	150	68	256	732	396	543	76	314	40	47	81	270	389	146	225	392	208	162	95	35	17	62	268	567		103	363	352			92	108	204	139	766	107	512	447	1044	285	114
Artiodactyla	Bovidae	Bison_bison_bison	M	-	L	C	V		Q	A	A	I	A	C	V	D	T		L	S	V	T	Y	R	T		S	T	D	Q	D	E		R	T	V			S	S	G	V	S	N	K	R	L	V	T
Artiodactyla	Bovidae	Bos_indicus	M	-	L	C	V	A	R	A	A	I	A		V		T	Q	L	S	V	T	Y	R	T		S	T	D	Q	D	E		R	T	V			S		G	V	S	N	K	R	L	V
Artiodactyla	Bovidae	Bos_mutus	M	-	L	C	V		R	A	A	I	A	C	V	D	T	Q	L	S	V	T	Y	R	T	N	S	T	D	Q	D	E		R	T	V			S	S	G	V	S	N	K	R	L	V	T
Artiodactyla	Bovidae	Bos_taurus	M	-	L	C	V	A	R	A	A	I	A	C	V	D	T	Q	L	S	V	T	Y	R	T	N	S	T	D	Q	D	E		R	T	-			S	L	G	V	S	N	K	R	L	V	T
Artiodactyla	Bovidae	Bubalus_bubalis	M	F	L	C	V		R	A	A	V	A	C	V	D	T	Q	L	S	V	T	Y	R	T		S	T	D	Q		E		R	A	V			S	S	G	V	S	N	K	R	L		T
Artiodactyla	Bovidae	Capra_hircus	M	F	L	C	V		R	A	A	V	A	C	V	D	T	Q	L	S	V	T	Y	R	T		S	T	D	Q	D	E		R		V			S	L	G	V	S	N	K	R	L	V	T
Artiodactyla	Bovidae	Ovis_aries	M	F	L	C	V	M	R	A	A	V	-	C	V	D	T	Q	L	S	V	T	Y	R	T	N	S	T	D	Q	D	E		R	T	V			S	L	G	V	S	N	K	R	L	V	-
Artiodactyla	Bovidae	Pantholops hodgsonii	M	F	L	C	V		R	A	A	V	A	C	V	D	T	Q	L	S	V		Y	R	T	N	S	T	D	Q	D	E		R	T	V			S	L	G	V	S	N	K	R	L	V	T
Artiodactyla	Cervidae	Odocoileus_virginianus_texanus	M	-	L	C		V	R	A	A	V	A	R	A	D	T	Q	L	S	M	T	Y	R	A		N	T			D	E		R	T	V			S		G	V	S	S	K		P	V	A
Artiodactyla	Camelidae	Camelus_bactrianus	M	L	V	S	A		Q	V	A	L	A	R	A	N	A	R	F	N	T	A	H	K	A	D	G	A	E	Q	D	G		-	A	V			G	S	D	T	N	S	R	R	P	V	A
Artiodactyla	Camelidae	Camelus_dromedarius	M	L	V	S	A	V	Q	V	A	L	A	R	A	N	A	R	F	N	T	A	H	K	A	D	G	A	E	Q	D	G		-	A	V			G	S	D	T	N	S	R	R	P	V	A
Artiodactyla	Camelidae	Camelus_ferus	M				A		Q	V	A	L	A	R	A	N	A	R	F	N	T	-	H	K	A	-	G	A	E	Q	D	G		-	A	V			-	S	D	T	N	S	R	R	P	V	A
Artiodactyla	Camelidae	Vicugna_pacos	M					V			A		-	-		N		R	F	N	T	A	H	K		D			E	Q	D	-		-	A	V				S	D	T		S	R	R	A	V
Primates	Cercopithecidae	Rhinopithecus_bieti	M	F	L	C	V	M	R	A	A	I	A	C	V	D	T	Q	L	S	V	-	Y	R	T	N	-	T	D	Q	D	E		R	T	V			S	S	G	V	S	N	K	R	P	I	T
Primates	Cercopithecidae	Rhinopithecus_roxellana	M	F	L	C	V	M	R	A	A	I	A	C	V	D	T	Q	L	S	V	T	Y	R	T	N	S	T	D	Q	D	E		R	T	V			S	L	G	V	S	N	K	R	L	V	T
Primates	Cercopithecidae	Colobus_angolensis	M	L	L	C	A	V	R	A	T	V	T	R	V	N	A	R	F	S	A	A	-	K	T	D	S	A	D	Q	D	G		K	T	V			G	S	G	I	N	S	K	R	P	V	A
Primates	Cercopithecidae	Piliocolobus_tephrosceles		L	L	C	A	V	R	A	T	A	T	R	V	N	A	R	F	S	A	A	H	K	T	D	S	A	D	Q	D	G		K	T	V			G	S	G	I		S		R	P	V	A
Diprotodontia	Macropodidae	Notamacropus_eugenii	-				A	M	-			Q	A	H	-	N	A	Q	F	N	V	K	H	-	A	D	S	V	E	K	D	G		K	A	-			D	-	-		S		R	S		I
Perissodactyla	Equidae	Equus_asinus	M	P	V	S	A	V	R	A	T	F	T	R	A	N	A	R	F	N	T	A	H	K	A	-	S	A	E	R	D	G		K	A	V			G	S	D	V	N	S	R	S	P	I	A
Perissodactyla	Equidae	Equus_caballus	M	P	V	S	A	V	R	A	T	L	T	R	A	N	A	R	F	N	T	A	H	K	A	D	S	A	E	R	D	G		K	A	V			G	S	D	V	N	S	R	S	P	I	A
Perissodactyla	Equidae	Equus_przewalskii	M	P	V	S	A	-	R	A	T	L	T	R	A	N	A	R	F	N	T	A	H	K	A		S	A			D	G		K	A	V			G	S	D	V	N	S	R	S	P	I	A
Perissodactyla	Rhinocerotidae	Ceratotherium_simum_simum	M	L	V	S	V		R	T	T	L	T	C	A	N	A	R	F	N	A	A	H	K	A		S	A	E	Q	D	G		K	A	V			G	S	G	V	N	S	R	S	P	V	T
Rodentia	Muridae	Meriones_unguiculatus	M	L	A	P	A	V	Q	T	T	L	P	R	A	N	P	Q	F	N	E	V	H	K	A		S	T	Q	E	S	G		K	A	A			G	-	S		N	S	R	S	P	V	A
Rodentia	Muridae	Mus_caroli	M	I	I	S	A	V	Q	A	T	P	S	C	A	N	P	Q	F	N	E	V	H	K	A	D	T	T	E	E		G		K	A	A			G	S	G	T	S	S	R	S	P	I	A
Rodentia	Muridae	Mus_musculus	M	I	I	P	A	V	Q	A	A	P	S	C	A	N	P	Q	F	N	E	V	H	K	A	D	T	T	E	E	N	G		K	A	A			G	S	G	T	S	S	R	S	P	I	A
Rodentia	Muridae	Mus_pahari	M	I	V	P	A	V	Q	A	T	P	S	C	A	N	P	Q	F	N	E	V	H	K	A	D	T	T	E	E	S	E		K	A	A			G	S	G	T	S		R	S	P	I	A
Rodentia	Muridae	Mus_spretus	M	I	I	P	A	V	Q	A	T	P	S	C	A	N	P	Q	F	N	E	V	H	K	A	D	T	T	E	E	N	G			A	A			G	S	G	T	S	S	R	S	P	I	A
Rodentia	Muridae	Rattus_norvegicus	M	I	V	P	A	V	Q	A	T	P	S	C		N	P	Q	F	N	E	V	H	K	A	D	C	T	E	E	S	E		K	A	A			G	S	G	T	P	G	R	S	P	I	A
Rodentia	Sciuridae	Marmota_marmota_marmota	M	I	V	S	A	V	Q	T	A	F	S	C	A	N	T	Q	F	N	A	A	H	K	A		S	A	E	Q	D	G		H	S	A			G	S	G	I	S	S	R	S	P	I	A
Rodentia	Sciuridae	Ictidomys_tridecemlineatus	M	L	V	S	A	V	Q	T	A	F	S	C	A	N	T	Q	F	N	A	A	H	K	A	D	S	A	E	Q	D	G		H	S	A			G	S	G	I	S	S	R	S	P	I	S
Rodentia	Bathyergidae	Heterocephalus_glaber	M				A	V	Q	T	A	F	A	R	A	D	A	R	F	N	T	A	H		A	D	S	A	E	Q	N	V		K	A	A			G	S	G	I	S	S	R		P	I	A
Rodentia	Bathyergidae	Fukomys_damarensis	M	L	A	S	A	V	Q	T	T		A	H	A	D	A	Q	F	N	A	A	H	K	V	D	S	A	E	Q	N	-		K	A	A			G	S	G	-	S	S	R	S	P	I	A
Rodentia	Castoridae	Castor_canadensis	M				A	V	Q	A	T	S	T	C	A	N	P	R	F	N	A	A	-	K	T		S	A	E	Q	S	G		H	-	A			G	A	S	V	S	S	R	S		I	A
Rodentia	Caviidae	Cavia_porcellus	M	L	A	S	T	V	Q	T	T	F	A	R	A	D	A	Q	F	N	T	A	H	K	V	-	S	A	E	Q	S	G		K	A	V			G		G	M	S	S	R	S	P	I	A
Rodentia	Caviidae	Cavia_aperea	M				T	V	Q	T		F	A	R	-		A	Q	F	-	T	A	-	K	V	-	-	A	E	Q	S	G			-	V			G		G	M	S		R	S	P	I	A
Rodentia	Cricetidae	Cricetulus_griseus	M	L	V	S	A	M		A	T	-	S	R	A		P	Q	F	N	E	V	H	K	A	D	S	T	E	E	D	G		K		A			G	S	G	S	S	S	R	S	P	I	A
Rodentia	Cricetidae	Microtus_ochrogaster	M	L	V	S	A	V	R	T	T	L	S	R	A	N	P	Q	F	N	E	V	H	K	A	D	S	T	E	E	S	G		-	-	A			G	S	G	T	S	S	R	S	P	I	A
Rodentia	Cricetidae	Mesocricetus_auratus	M	L	V	P	A	-	Q	A	T	L		R	A	N	P	Q	L	-	E	V	H	K	A	D	S	T	E	E	N	G		K	-	A			G	S	G	-	S	S	R	S	P	I	A
Rodentia	Cricetidae	Peromyscus_maniculatus	M	L	A	P	A	V	Q	T	K	L	S	R	A	S	P	Q	F	-	E	V	H	K	A	D	S	T	-	-	S	G		K	-	A			G	S	G	T	S	S	R	S	P	I	A
Rodentia	Chinchillidae	Chinchilla_lanigera	M	L	S	S	A	V	Q	T	T	F	A	R	A	D	A	Q	F	N	A	A	H	K	V	D	S	A	Q	Q	N	E		K	A	A			G	S	G	T	S	S	Q	S	P	I	A
Rodentia	Dipodidae	Jaculus_jaculus	M	L	I	L	A	V	Q			V	A	R	A	N		Q	F	N	A		H	K	A	D	S	T	E	E	S	E			A	V			G	-	G	I	N		K	C	P	I	-
Rodentia	Octodontidae	Octodon_degus	M	L	T	S	V	V	Q	-		F	A	R	A	D	A	Q	F	N	A	A	H	K	A	D	S	A	Q	Q	S	E		K	A	A			G	S	A	I	S		R	S	P	T	A
Rodentia	Spalacidae	Nannospalax_galili	M	L	V	S		V	Q			F		R	A	N	P	Q	F	N	E	V	H	K	A	D	S	T	E	E	S	G		K	-	A			G			S	S	S	K	S	P	I	A
Rodentia	Heteromyidae	Dipodomys_ordii	M	L	V	L	A	V	Q	T		S	-	R	A	S	P	Q	F	-	A	A	H		A	D	S	S	E	Q	S	D			T	A			G	-	G	I	S		K	S	P	I	-
Lagomorpha	Leporidae	Oryctolagus_cuniculus	M	L	V	P	A	V	Q	A	A	L	-	C	A	N	T	-	F	N	A	A	Y	K	A	D		A	D	R	D	A			A				G	-	G	I	S	S	R	-	P	I
Lagomorpha	Ochotonidae	Ochotona_princeps	M	L	V	P	A	V	Q	V	A	L	-	R	A	N	T	Q	F	N	A	A	H	K	V	D	R	T	D	R	N	G		-	A	V			G	-	G	T	S	T	R	S	P	I	-
Artiodactyla	Suidae	Sus_scrofa	M	L	M	S	A	V	Q	T	T	L	T	R	A	N	A	Q	F	Y	A	A	H	K	A	G	G	A	E	R	N	E		K	A	V			G	L	S	I	N	S	K	S	P	V	A
Carnivora	Ursidae	Ailuropoda_melanoleuca	M	L	L	S	A	M	Q	T	T	L	A	H	A	N	T	R	F	N	T	-	H	K	A	D	G	V	E	Q	D	G		K	A	A			G	T	S		S	S	Q	S	P	I	A
Primates	Hominidae	Homo_sapiens	I	L	V	W	A	V	Q	T	T	V	T	R	A	N	A	R	F	N	A	A	H	K	A	D	G	E	E	R	N	G		K	A	V			G	S	S	I	N	S	R	S	P	V	A
Primates	Hominidae	Gorilla_gorilla	I	L	V	L	A	V	Q	T	T	V	T	R	A	N	A	-	F	N	A	A	H	K	T	D	G	E	E	R	N	G		K	A	V			G	S	S	I	N	S	R	S	P	V	A
Primates	Hominidae	Pongo_abelii	I	L	V	W	A	V	Q	T	T	V	T	R	A	N	A	R	F	N	A	A	H	K	A		G	E	E	-	N	G		K	A	V			G	S	S	I	N	S	R	S	P	V	A
Primates	Hominidae	Pan_paniscus	I	L	V	W	A	V	Q	T	T	V	T	R	A	N	A	R	F	N	A	A	H	K	A	D	G	E	E	R	N	G		K	A	V			G		S	I	N	S	R	S	P	V	A
Primates	Hominidae	Pan_troglodytes	-	L	V	F	A	V	Q	T	T	V	T	R	A	N	A	R	F	N	A	A	H	K	A	D	G	A	E	R	N	G		K	A	A			G	S	S	I	N	S	R	S	P	I
Primates	Cercopithecidae	Papio_anubis	I	L	M	S	A	V	Q	V	T	L	T	C	A	N	A	Q	F	N	A	A	H	K	A	D	S	A	E	Q	D	G		S	A	V			G	S	N	T	N	S	R	S	P	V	A
Afrotheria	Elephantidae	Loxodonta_africana	M	L	M	S	V	V	Q	M	S	L	T	R	A	T	T	Q	F	N	A	A	H	K	V	D	S	A	E	Q	D	G		N	A	V			G	L	N	T	N	S	R	S	P	V	A
Afrotheria	Trichechidae	Trichechus_manatus_latirostris	M	-	M	S	A	-	Q	M	T	L	T	H	A	N	T	Q	-	N	V	A	H	-	A	D	S	-	E	Q	D	R		-	A	V			G	-	S	P	N	S	K	S	L	V	T
Hyracoidea	Procaviidae	Procavia_capensis	M	-	G	-	T	M	Q	E		Q	A	H	A	N	A	Q	F	N	M	K	H	K	A		S	V	-	K	D	G		K	-	M			D	-	H	L	S	S	R	S		I
Diprotodontia	Phascolarctidae	Phascolarctos_cinereus	M	P	L	-	-	V		T	-		T	C		N		R	F	N	T	A	H	K	A							G		K	A	V			G	S		V	S	S	-		-	I
Pilosa	Megalonychidae	Choloepus_hoffmanni	M	-	G	-	T	M	Q	A		Q	A	H		N	A	Q	F	N	V	K	H	K	A	N	S	V			N	G				M			D	P	N	-	S	S	R	N	-	I
Didelphimorphia	Didelphidae	Monodelphis_domestica	I	L	-	-	A	V	Q		T	-	T	R	A	N	A	Q	F	N		A	H	K	A	D	S	E	E	R	N	G		K	A	-			G	S	S	I	N	S	R	S	P	V	A
Primates	Hylobatidae	Nomascus_leucogenys	I	L	V	W	V	V	Q	T	T	-	T	R	A	N	A	R	F	N	A	A	H	K	A	D	G	-	E	-	N	G		K	A	V			G	S	S	T	N	S	R	S	P	V	A
Primates	Cercopithecidae	Cercocebus_atys	I	L	V	F	A	V	Q	T	T	V	T	R	A	N	A	R	F	N	A	A	H	K	A	D	G	A	E	R	N	G		K	A	A			G	S	S	I	N	S	R	S	P	V
Primates	Cercopithecidae	Chlorocebus_sabaeus	I	L	V	F	A	V	R	T	T	V	T	R	A	N	-	R	F	N	A		H	K	A	D	G	A	E	R	N	G		K	A	A			G	S	S	I	N	S	R	S	P	V	A
Primates	Cercopithecidae	Macaca_fascicularis	I	L	V	F	A	V	Q	T	T	V	T	R	A	N	A	R	F	N	A	A	H	K	A	D	G	A	E	R	D	G		K	A	A			G	S	S	I	N	S	R	S	P	V	A
Primates	Cercopithecidae	Macaca_mulatta	I	L	V	F	A	V	Q	T	T	V	T	R	A	N	A	-		N	A	A	H	K	A	-	G	A	E	-	D	G		K	-	A			G	S	S	I	N	S	R	S	P	V
Primates	Cercopithecidae	Macaca_nemestrina	I	L	V	F	A	V	Q	T	T	V	T	R	A	N	A	R	F	N	A	A	H	K	A	D	G	A	E	R	D	G		K	A	A			G	S	S	I		S	R	S	P	V
Primates	Cercopithecidae	Mandrillus_leucophaeus	I	L	V	F	A	V	H	T	T	V	T	C	A	N	A	R	F	N	A	A	H	K	A	D	G	A	E	R	N	G		K	A	A			G	S	G	I	N	S	R	S	P	V
Primates	Cebidae	Callithrix_jacchus	M	L	V	R	A	V	Q	T	T	L	T	R	A	N	A	R	F	N	A	A	H	K	A	D	-	A	E	R	N	G		K	A	V			G	S	G	T	N	S	R	H	P	I	A
Primates	Cebidae	Cebus_capucinus	M	L	V	R	A	V	Q	T		L	T	R	A	N	A	R		N	A	A	H	K	M	D	G	A	E	R	N	G			A	V			G	S	G	T	-	S	R	S	P	I	A
Primates	Cebidae	Saimiri_boliviensis	M	L	I	R	A	V	Q	T	T	L	T	R	A	N	A	R	F	N	A	A	H	K	A	D	S	A	E	R	N	G		K		V			G		G	T	N	S	R	S	P	I	A
Primates	Aotidae	Aotus_nancymaae	M	L	V	R	A	V	Q	T	T	L		R	A		A	R	F		A	A	H	K	A	D	G	A	E	R	N	G		E	A	V			G	S	G	T	N	S	R	S	P	I	A
Primates	Cheirogaleidae	Microcebus_murinus	M	L	V	S		V	Q	-	T	L	S	H	A	D	T	Q		N	A	A	Q	K	A		G	A	D	R	N	G		K	A	V			G	L		I	S	S	R	I	P	V	A
Primates	Galagidae	Otolemur_garnettii	M	L	A	S	A	V	Q		T	L	T	H	A	D	A	Q	F	N	A	A	H	K	A	D	S	A	E	Q	N	G		K	A	-			G	L	G	M	N	S	R	I	P	V	A
Primates	Indriidae	Propithecus_coquereli	I	L	V	S	A	V	Q	V	T	L		H	A	D	A	Q	F	N	A	A	Q	K	A		G	A	E	R	N	G		K	A				G	L	G	I	G		-		P	V	A
Primates	Tarsiidae	Carlito_syrichta	M	L	V	P	T	-	Q	T	T	L	T	H	A	N	A	Q	F	-	T	A	H	-	-	N	S	S	E	Q	N	G		K	S	V			G	L	G	I	N		-	S	P	V	A
Chiroptera	Pteropodidae	Pteropus_alecto	V	L	V	S	A	V	Q	T	T	F	T	C	A	N	A	R	F	N	M	-	-	K	A	D	C	A	G	R	D	G		K	A	A			G	P	G	I		S	Q	S	P	I	A
Chiroptera	Pteropodidae	Pteropus_vampyrus	V	L	V	S	A	V	Q	T	T	F	T	C	A	N	A	R	F	N	M	-	H	K	A	D	C	A	G	R	D	-		K	A	A			G	P	G	I	S	S	-	S	P	I	A
Chiroptera	Pteropodidae	Rousettus_aegyptiacus	M	L	M	S	A	V	Q	I		L	T	C	A	N	A	R		N	M	A	H	K	A		C	A	G	R	D	G		K	A	A			G	P	G	I	S	S	Q	S	P	I	A
Chiroptera	Vespertilionidae	Eptesicus_fuscus	M	L	L	S	A		Q	T	T	L	A	H	A	N	T	R	F	N	V	A	Y	K	A	D	-	A	E	Q	D	G		R	A	A			G	P	G	L		S	Q	S	P	I	A
Chiroptera	Vespertilionidae	Myotis_brandtii	M	L	L	S	S	V	Q	T	T	P	T	H	A	N	T	R	F	N	V		Y	K	A	D		A	E	Q	D	-		K	A	A			G	P	G	I		S	Q	S	P	I
Chiroptera	Vespertilionidae	Myotis_davidii	M	L	L	S	A		Q	T	T	-	T	H	A	N	T	R	F	N	V		Y	K	A	D		A	E	Q	D	G		K	A	A			G	A	G	I			Q	S	P	I	-
Chiroptera	Vespertilionidae	Myotis_lucifugus	M	L	L	S	A	V	Q	T	T		T	H	A	N	T	R	F	-	V	V	Y	K	A	D		A	E	Q	D	G		K	A	A			G	P	G	I		S	Q	S	P	I
Chiroptera	Hipposideridae	Hipposideros_armiger	M	L	V	S	A	V	R	T	T	L	T	R	A	S	T		F	N	T	A	Y	K	A		C	T			D	G		K	A	V			G	P	A	V	S	S	Q				A
Chiroptera	Vespertilionidae	Miniopterus_natalensis	M	L	L	P	A	V	Q	K	T	L	A	R	A	N	-	R	F	N	A	A	Y	K	A	-	C	T	E	Q	D	G		K	A	V			G	P	G	I	S	S	Q	S	P	V	A
Chiroptera	Rhinolophidae	Rhinolophus_sinicus	M	L	V	S	A		R	V	T	S	A	H	A	S	A	R	F	N	A	A	Y	K	A	D	C	T	E	P	D	G		K	A	A			G	P	G	V	S	S	Q	S	P	I	A
Artiodactyla	Lipotidae	Lipotes_vexillifer		L	V	S	A		Q	T	S	L	T	H	A	N	A	R	F	-	P	A	H	K	A	-	G	A			N	G		K	A	V				S	S	I	N	S	R	S		I	A
Artiodactyla	Delphinidae	Tursiops_truncatus	M		V	S	A	V	Q	T	S	L	T	H	A	N	A	R	F	D	P	A	H	K	A	-	G	A	E	W	N	G		K	A	V			G	S	S	I	N	S	R	S	P	I	A
Artiodactyla	Delphinidae	Orcinus_orca	M	L	V	S	A		Q	T	S	L	T	H	A	N	A	R	F	D	P	A	H	K	A	-	G	A	E	W	N	G		K	A	V			G	S	S	I	N	S	R	S	P	I	A
Artiodactyla	Monodontidae	Delphinapterus_leucas	M	L	V	S	A		Q	T	S	L	T	H	A	N	A	R	F	-	P	A	H	K	A		G	A	E	W	N	G		K	A	V			G	S	S	I	N	S	R	S	P	I	A
Artiodactyla	Physeteridae	Physeter_catodon	M	L	V	S	A	V	Q	T	S	L	T	H	A	N	A	R	F	-	P	A	H	K	A	-	G	A	E	W	N	G		K	A	V			G	S	S	I	N		R	S	P	I	A
Artiodactyla	Balaenopteridae	Balaenoptera_acutorostrata_scammoni	M	L	V	S	A	-	Q	T	S	L	T	H	A	N	A	R	F	D	P	A	H	K	A	-		A			N	E		K	T	V				-	S	I	N	S	R	S	P	I	A
Carnivora	Ursidae	Ursus_maritimus	M		V	S	A	V	Q	T	T	L	-	H	A	N	T	R	F	N	A	A	H	K	A	D	G	A	E	Q	D	G		K	A	A			G	T	S	I		S	Q	S	P	I	A
Carnivora	Felidae	Felis_catus	M	L	V	S	A	V	R	T	T	L	T	H	A	N	T	Q	F	N	A	A	H	K	A	D	G	V	E	Q	D	G		K	A	A			G	M	A	I	N	S	Q	S	P	I	A
Carnivora	Felidae	Panthera_pardus	M	L	V	S	A		R	T	T	L	A	H	A	N	T	Q	F	N	A	A	H	K	A	D	G	V	E	Q	D	G		K	A	A			G	M	A	I	N	S	Q	S	P	I	A
Carnivora	Felidae	Panthera_tigris_altaica	M	L	V	S	A	V	R	T	T	L	-	H	A	N	T	Q	F	N	A	A	H	K	-	D		V	E	Q	D	G			A	A			G	M	-	I		S	Q	S	P	I	-
Carnivora	Felidae	Acinonyx_jubatus	M	L	V	S	A		R	T	T	L	-	H		N	T	Q	F	N	A	A	H	-	-	D		V	E	Q	D	G		K	A	A			G	M	A	I		S	Q	S	P	I	-
Carnivora	Canidae	Canis_familiaris	M	L	L	S	A	V	Q	T	T	L	S	H	A	N	T	R	F	N	A	A	H	K	A	D	G	T	E	Q	D	A		Q	T	A			G	T	G	I	S	S	R	S	P	I	A
Carnivora	Mustelidae	Mustela_putorius	M	L	V	S	A	V	Q		T	L	A	H	A	N	T	R	F	N		-	H	K	A	D	G	A	E	Q	D	G			A	A			G	T	G	I	S	S	R	S	P	I	A
Carnivora	Mustelidae	Enhydra_lutris_kenyoni	M	L	V	S	A		Q	I	T		A	H	A	H	T	R	F	N	A	A	H	K	A	D	-		E	Q	D	G		K	A	A			G	T	G	I	S	S	R	S	P	I	A
Carnivora	Odobenidae	Odobenus_rosmarus_divergens	M	L	V	S	V		Q	T	T	P	A	Q	A	N	T	R	F	N	A	A	H	K	T	D	G	A	E	Q	E	G		K	A	A			G	T	G	I	S	S	R	G	P	I	A
Carnivora	Phocidae	Leptonychotes_weddellii	M				A	V	Q	T	T	L	A	Q		N	T	R	-	N	A	A	Y	K	A	D	G		E	Q	E	G		K	A	V			G	T	G	I	S	S		S	P		A
Carnivora	Phocidae	Neomonachus_schauinslandi	M	L	V	S	A	V	Q	T	T	L	T	Q	A	N	T	R	F	N	A	A	Y	K	A	D	S	A	E	Q	E	G		K	A	V			S	T	G	I	T	S	R	S	P	I	A
Afrotheria	Tenrecidae	Echinops_telfairi	M					V	R		T	L	-	R	A	N		Q	F	N	-	A	-	K	A				E	R	D	G		S	A	V			G		-	-	-	S	R	S	P	V	A
Afrotheria	Chrysochloridae	Chrysochloris asiatica	M	-	M	S	A		Q	V	T	-	A	H	A	N	T	Q	F	N	T	A	L	K	A	D	S	A	E	Q	S	G			T	V				S	N	M	N	S	R	S	P	I	A
Eulipotyphla	Soricidae	Sorex_araneus	M	-	V	-	A	V	Q	I	T	-	A	R	A	N	T	R		N	P		Y	K		H		R			D	-			A	A				S	-	I	S		-	S	P	V	A
Eulipotyphla	Talpidae	Condylura_cristata	M	H	G	P	A		Q		S	L	T	R	A	N	T	R	F	N	V	A	H	K	A	D		T	E	Q	D	G		K	A	V			G	S	S	T	S	S	K	G	P	I	A
Eulipotyphla	Erinaceidae	Erinaceus_europaeus	M	L	-	-	A	V		I		-		R	A	-	T	-	F	N	T	A	-	K	A	D	-	T	N	Q	-	G			A	A			-	S	-	I		S	K	S	-	-
Dermoptera	Cynocephalidae	Galeopterus_variegatus	I	L	I	S	-	V	Q	T	T	L	T	R	A	D	A	R	F	N	T	A	-	K	A	D	S	A	G	K	N	G		K	A	V			G		G	I		S		S		I	A
Cingulata	Dasypodidae	Dasypus_novemcinctus	-	-	V	P	A	V	Q	T	T	L	T	R	A	N	A	R	F	N	T	A	-	K	A	-	S	A	-	R	D	G		K		V			G		S	I	S	S	R	S	P	V	A
Macroscelidea	Macroscelididae	Elephantulus_edwardii	M	L	M	S	A		Q			L	A	R	A	N	T	Q	F	N	V	A	Q	K	V	-	-	A	-	Q	D	G			A	V			G	S	S	M	N	S	R	S	P	I	A
Tubulidentata	Orycteropodidae	Orycteropus_afer_afer	M	V	M	L	T		Q	M	T	-	S	-	A	N	T	Q	F	N	A	A	H	K	A	N	S	A	-	Q	D	G		N	A	V			G	S	N	-	N	S	R	S	P	V	A
Scandentia	Tupaiidae	Tupaia_belangeri	M	-	V	S	A	V	Q	I		L	A	-	A	-		Q	F	N		A	-	K	A	D			-	-	N	G		K	G	A			G		S	I		S	K	T	P	I	-
Scandentia	Tupaiidae	Tupaia_chinensis	M		V	S	A	V	Q	I	T	L	A	C	A	N	A	Q	F	N	V	A	Y	K	A		S	A	E	Q	N	G		K	G	A			G	-	S	I	S	S	K	T	P	I	S
Monotremata	Ornithorhynchidae	Ornithorhynchus_anatinus					-	V	Q	A	N	-	A	-	A	N		-	F	D	V	-	H		T	D	S	V				G			-	V			-	-	-	-	-	S	-	T		V	-
Dasyuromorphia	Dasyuridae	Sarcophilus_harrisii	M	-	G	-	T	M	Q	T	K	Q	A	H	A		A	Q	F	N	V	-	H	K	A	D	S	V			D	G		K	T	I			D	-		-	S	S	R	N	-	I
Pholidota	Manidae	Manis_javanica	M	L	T	V	T	-		T	T	L	A	H	A	D	T	G	F	N	M	A	Q	K	A	Q	S	A			D	G		Q	T	A			G	S	G	I		N	R	N	P	V	A
[truncated: 85 more columns]

## Sheet: PIC data set
	ACOX1	EPO1	EPO2	EPO3	ASB13	ERC1	BCKDK	FBXO48	HSDL1	ARMC5	ARID3B	FRMPD1	ENO2	ADAD1	POU2AF1	PPARD	HTATIP2	CCDC77	SYT13	APBA2	DENND6A	DNAJC3	KIAA0513	EPHA5	RHPN1	TEX264	TACR2	TACR21	ANXA4	RNF157	CCL28	ZZZ3	SLC44A1	INPPL1	IDNK	DCLK3	MICU3	RASGRF1	USP44	GFPT2	MANEA	FBN2	OPRK1	NUDT14	NDC1	ZW10	LTBP1	JAG1	UMPS
Sarcophilus_harrisii	1	0	0	0	0	1	0	0	0	0	1	0	0	0	0	1	0	0	1	0	0	0	0	0	1	0	0	0	1	0	0	1	0	0	0	0	0	1	0	0	0	0	0	0	0	0	0	1	1
Phascolarctos_cinereus	1	0	0	0	0	1	0	0	0	0	1	0	0	0	0	1	0	0	0	0	0	0	0	0	1	0	0	0	1	0	0	0	0	0	0	0	0	1	0	0	0	0	0	0	0	0	0	1	1
Macropus_eugenii	0	0	0	0	0	1	0	0	0	0	1	0	0	0	0	1	0	0	1	0	0	0	0	0	1	0	0	0	1	0	0	0	0	0	0	0	0	1	0	0	0	0	0	0	0	0	0	1	0
Sorex_araneus	1	0	0	0	0	0	0	0	0	0	1	0	0	0	1	0	0	0	0	0	1	0	0	0	0	0	0	0	1	0	0	0	0	0	0	0	0	1	0	0	0	0	1	0	0	0	0	1	1
Condylura_cristata	1	0	0	0	0	0	0	0	0	0	0	0	0	0	1	0	0	0	1	0	0	0	0	0	0	1	0	1	1	0	0	0	1	0	0	0	0	1	0	1	0	0	0	0	0	0	0	0	0
Panthera_tigris	1	0	0	0	0	0	1	0	0	0	0	0	0	0	1	1	0	0	0	0	0	0	0	0	0	0	0	1	1	0	0	0	0	0	0	0	0	0	0	0	0	0	0	0	0	0	0	0	0
Panthera_pardus	1	0	0	0	0	0	1	0	0	0	1	0	0	0	1	1	0	0	0	0	0	0	0	0	0	0	0	1	1	0	0	0	0	0	0	0	0	0	0	0	0	0	0	0	0	0	0	0	0
Felis_catus	1	0	0	0	0	0	1	0	0	0	0	0	0	0	1	1	0	0	0	0	0	0	0	0	0	0	0	1	1	0	0	0	0	0	0	0	0	0	0	0	0	0	0	0	0	0	0	0	0
Acinonyx_jubatus	1	0	0	0	0	0	1	0	0	0	0	0	0	0	1	1	0	0	0	0	0	0	0	0	0	0	0	1	1	0	0	0	0	0	0	0	0	0	0	0	0	0	0	0	0	0	0	0	0
Canis_lupus	1	0	1	0	0	0	0	0	0	0	0	0	0	0	1	0	0	0	0	0	0	0	0	0	0	1	0	1	1	0	0	1	0	0	0	1	0	1	0	0	0	0	0	0	0	0	0	0	0
Enhydra_lutris	1	0	0	0	0	0	0	0	0	0	1	0	0	0	1	0	0	0	0	0	0	0	0	0	0	0	0	1	1	0	0	0	0	0	0	1	0	1	0	0	0	0	0	0	0	0	0	1	0
Mustela_putorius	1	0	0	0	0	0	0	0	0	0	1	0	0	0	1	0	0	0	0	0	0	0	0	0	0	0	0	1	1	0	0	0	0	0	0	1	0	1	0	0	0	0	0	0	0	0	0	0	0
Odobenus_rosmarus	1	0	0	0	1	0	0	0	0	0	1	0	0	0	1	0	0	0	0	0	0	0	1	0	0	0	0	1	0	0	0	0	0	0	0	1	0	1	0	0	0	0	0	0	0	0	0	0	0
Leptonychotes_weddellii	1	0	0	0	0	0	0	0	0	0	1	0	0	0	1	0	0	0	0	0	1	0	0	0	0	0	0	1	0	0	0	0	1	0	0	1	0	1	0	0	0	0	0	0	0	0	0	1	0
Monachus_schauinslandi	1	0	0	0	0	0	0	0	0	0	0	0	0	0	1	0	0	0	0	0	1	0	0	0	1	0	0	1	0	0	0	0	1	0	0	1	0	0	0	0	0	0	0	0	0	0	0	1	1
Ailuropoda_melanoleuca	1	0	1	0	0	1	0	0	0	0	1	0	0	0	1	0	0	0	0	0	0	0	0	0	0	0	0	1	1	0	0	0	0	0	0	0	0	1	0	0	0	0	0	0	0	0	1	1	0
Ursus_maritimus	1	0	0	0	0	0	0	0	0	0	0	0	0	0	1	0	0	0	0	0	0	0	0	0	0	0	0	1	1	0	0	0	0	0	0	0	0	0	0	0	0	0	0	0	0	0	1	1	0
Manis_javanica	1	0	0	0	0	0	0	0	0	0	1	0	0	1	1	0	0	0	0	0	0	0	0	0	1	0	0	0	1	0	0	1	0	0	0	1	0	0	1	0	0	0	1	0	0	0	1	1	0
Equus_caballus	1	0	0	0	0	0	1	1	0	0	0	0	0	0	0	0	0	0	0	0	0	0	0	0	1	0	0	0	1	0	0	0	1	0	0	0	1	0	0	0	0	0	0	0	0	0	0	1	0
Equus_asinus	1	0	0	0	0	0	1	1	0	0	0	0	0	0	0	0	0	0	0	0	0	0	0	0	1	0	0	0	1	0	0	0	1	0	0	0	1	0	0	0	0	0	0	0	0	0	0	1	0
Ceratotherium_simum	1	0	0	0	1	0	1	0	0	0	0	1	0	0	0	0	0	0	0	0	0	0	0	0	1	0	0	1	1	0	0	0	1	0	0	1	1	0	0	0	0	0	1	1	0	0	0	0	0
Vicugna_pacos	1	0	0	0	0	0	0	0	1	0	0	0	0	0	0	0	0	0	0	0	0	0	0	0	0	0	0	1	1	0	0	0	1	0	0	0	0	0	0	0	1	0	1	0	0	0	0	0	0
Camelus_dromedarius	1	0	0	0	0	0	0	0	1	0	1	0	0	0	0	0	0	0	0	0	0	0	0	0	0	0	0	1	1	0	0	0	1	0	0	0	0	0	0	0	1	0	1	0	0	0	0	0	0
Camelus_bactrianus	1	0	0	0	0	0	0	0	1	0	1	0	0	0	0	0	0	0	0	0	0	0	0	0	0	0	0	1	1	0	0	0	1	0	0	0	0	0	0	0	1	0	1	0	0	0	0	0	0
Balaenoptera_acutorostrata	1	0	0	0	0	0	0	0	0	0	0	0	0	0	0	0	0	0	0	0	0	0	0	0	0	0	0	0	0	1	0	1	1	0	0	0	0	0	0	0	0	0	0	0	0	0	0	0	0
Physeter_catodon	1	0	0	0	0	0	0	0	0	0	0	0	0	0	0	0	0	0	0	0	0	0	0	0	0	0	0	0	0	0	0	0	1	0	0	0	0	0	0	0	0	0	0	0	0	0	0	0	0
Lipotes_vexillifer	0	0	0	0	0	0	0	0	0	0	0	0	0	0	0	0	0	0	0	0	0	0	0	0	0	0	0	0	0	0	0	0	1	0	0	0	0	0	0	0	0	0	0	0	0	0	0	0	0
Delphinapterus_leucas	1	0	0	0	0	0	0	0	0	0	0	0	0	0	0	0	0	0	0	0	0	0	0	0	0	0	0	0	0	0	0	0	1	0	0	0	0	0	0	0	0	0	0	0	0	0	0	0	0
Tursiops_truncatus	1	0	0	0	0	0	0	0	0	0	0	0	0	0	0	0	0	0	0	0	0	0	0	0	0	0	0	0	0	0	0	0	1	0	0	0	0	0	0	0	0	0	0	0	0	0	0	0	0
Orcinus_orca	1	0	0	0	0	0	0	0	0	0	0	0	0	0	0	0	0	0	0	0	0	0	0	0	0	0	0	0	0	0	0	0	1	0	0	0	0	0	0	0	0	0	0	0	0	0	0	0	0
Bubalus_bubalis	1	1	1	1	1	0	1	1	1	0	1	1	1	1	1	1	1	1	1	1	1	1	1	0	1	1	1	1	0	1	1	0	1	1	0	1	1	1	1	1	1	1	0	1	1	1	1	0	0
Bos_taurus	1	0	1	1	1	0	1	1	1	1	1	1	1	1	1	1	1	1	1	1	1	1	1	1	1	1	1	1	1	1	1	1	0	1	1	1	1	1	1	1	1	1	1	1	1	1	1	1	0
Bos_mutus	1	0	1	1	1	0	1	1	1	1	1	1	1	1	1	1	1	1	1	1	1	1	1	1	1	1	1	1	1	1	1	1	1	1	0	1	1	1	1	1	1	1	1	1	1	1	1	1	0
Bison_bison	1	0	1	1	1	0	0	1	1	1	1	1	1	1	1	0	1	1	1	1	1	1	1	0	1	1	1	1	1	1	1	1	1	1	0	1	1	1	1	1	1	1	1	1	1	1	1	1	0
Capra_hircus	1	1	1	1	1	0	1	1	1	0	1	1	1	1	1	1	1	1	1	1	1	1	1	0	1	1	1	1	1	1	1	0	1	1	1	1	1	1	1	1	1	1	1	1	1	1	1	1	1
Ovis_aries	1	1	1	1	1	1	1	1	1	0	0	1	1	1	1	1	1	1	1	1	1	1	1	1	1	1	1	1	1	1	1	1	1	1	1	1	1	1	1	1	1	1	1	0	1	1	1	1	1
Pantholops_hodgsonii	1	1	1	1	1	0	1	1	1	0	1	1	1	1	1	1	1	1	1	0	1	1	1	1	1	1	1	1	1	1	1	1	1	1	1	1	1	1	1	1	1	1	1	1	1	1	1	1	1
Odocoileus_virginianus	1	0	1	1	0	0	1	1	1	0	1	0	0	1	1	1	1	1	0	1	1	1	0	0	0	1	0	0	1	1	1	1	1	1	0	1	1	1	0	1	0	0	1	0	1	0	0	1	1
Sus_scrofa	1	0	0	0	0	0	0	0	0	0	0	0	0	0	0	1	0	0	0	0	0	0	0	0	0	0	0	0	0	1	0	0	1	0	1	0	0	0	0	1	0	0	1	0	0	0	0	0	0
Hipposideros_armiger	1	0	0	0	0	0	1	0	0	0	0	0	0	0	1	0	0	0	0	0	1	0	0	0	0	1	0	0	1	0	0	0	1	0	0	0	1	1	0	0	0	0	0	0	0	0	0	0	0
Rhinolophus_sinicus	1	0	0	0	0	0	1	0	0	0	1	0	0	0	0	0	0	0	0	0	1	0	0	0	0	1	0	0	1	0	0	0	0	0	0	1	1	1	0	0	0	0	0	0	0	0	0	0	0
Pteropus_vampyrus	0	0	0	0	0	0	0	0	0	0	0	1	0	0	0	0	0	0	0	0	0	0	0	0	0	0	0	0	1	0	0	0	0	0	0	1	0	1	0	0	0	0	0	0	0	0	0	0	0
Pteropus_alecto	0	0	0	0	0	0	0	0	0	0	0	1	0	0	0	0	0	0	0	0	0	0	0	0	0	0	0	0	1	0	0	0	0	0	0	1	0	0	0	0	0	0	0	0	0	0	0	0	0
Rousettus_aegyptiacus	1	0	0	0	0	0	0	0	0	0	0	1	0	0	0	0	0	0	0	0	0	0	0	0	0	0	0	0	1	0	0	0	0	0	0	1	0	1	0	0	0	0	0	0	0	0	0	0	0
Eptesicus_fuscus	1	0	1	0	0	0	0	0	0	0	1	0	0	0	1	0	0	0	1	0	1	0	0	0	0	0	0	1	1	0	1	0	0	0	0	1	0	0	0	0	0	0	0	0	0	0	0	0	0
Myotis_brandtii	1	0	1	0	0	0	0	0	0	0	0	0	0	0	1	0	0	0	1	0	1	0	0	0	0	0	0	1	1	0	0	0	0	0	0	1	0	0	0	0	0	0	0	0	0	0	0	0	0
Myotis_lucifugus	1	0	1	0	0	0	0	0	0	0	0	0	0	0	1	0	0	0	1	0	1	0	0	0	0	0	0	1	1	0	0	0	0	0	0	1	0	0	0	0	0	0	0	0	0	0	0	1	0
Myotis_davidii	1	0	1	0	0	0	0	0	0	0	0	0	0	0	1	0	0	0	1	0	1	0	0	0	0	0	0	1	1	0	0	0	0	0	0	1	0	0	0	0	0	0	0	0	0	0	0	0	0
Miniopterus_natalensis	1	0	0	0	0	0	0	0	0	0	1	0	0	0	0	0	0	0	0	0	1	0	0	0	0	1	0	1	1	0	0	0	1	0	0	1	0	1	0	0	0	0	1	0	0	0	0	0	0
Oryctolagus_cuniculus	1	0	0	0	0	0	0	1	1	0	0	1	0	0	1	1	0	0	0	0	1	0	0	0	0	0	1	0	1	0	0	0	0	0	0	1	0	1	0	0	0	0	0	0	0	0	0	0	0
Ochotona_princeps	1	0	0	0	0	0	0	0	1	0	0	0	0	0	1	1	0	0	0	0	0	0	0	0	0	1	1	0	0	0	0	0	1	0	0	1	0	1	0	0	0	0	0	0	0	0	0	0	0
Heterocephalus_glaber	1	0	0	0	0	0	0	0	1	0	1	0	0	1	0	0	0	0	0	0	0	0	0	0	1	0	0	1	0	0	0	0	0	0	0	1	0	1	0	0	0	0	0	0	1	0	0	0	1
Fukomys_damarensis	1	0	0	0	0	0	0	0	0	0	1	0	0	1	0	1	0	0	0	0	0	0	0	0	1	0	0	1	0	0	0	0	0	0	0	1	0	1	0	0	0	0	0	0	0	0	0	0	0
Cavia_porcellus	1	0	0	0	0	0	0	0	0	0	1	0	0	1	0	1	0	0	0	0	0	0	0	0	1	0	0	1	0	0	0	0	1	0	0	1	0	1	0	0	0	0	0	0	0	0	0	0	0
Octodon_degus	1	0	0	0	1	0	0	0	0	0	1	0	0	1	0	1	0	0	0	0	0	0	0	0	1	0	0	1	0	1	0	0	0	0	0	0	0	1	0	0	0	0	0	0	0	0	0	0	0
Chinchilla_lanigera	1	0	0	0	0	0	0	0	0	0	1	0	0	1	0	1	0	0	0	0	0	0	0	0	1	0	0	1	0	1	0	0	0	0	0	1	0	1	0	0	0	0	0	0	0	0	0	0	0
Rattus_norvegicus	1	0	0	0	0	0	0	1	0	0	0	1	0	0	0	1	0	0	0	0	0	0	0	0	0	1	0	0	0	1	0	0	0	0	0	1	0	0	0	0	0	0	0	0	0	0	0	1	0
Mus_musculus	1	0	0	0	0	0	0	1	1	0	0	1	0	0	0	1	0	0	0	0	0	0	0	0	0	1	0	0	0	0	0	0	0	0	0	1	0	1	0	0	0	0	0	0	0	0	0	1	0
Mus_spretus	1	0	0	0	0	0	0	1	0	0	0	1	0	0	0	1	0	0	0	0	0	0	0	0	0	1	0	0	0	0	0	0	0	0	0	1	0	1	0	0	0	0	0	0	0	0	0	1	0
Mus_caroli	1	0	0	0	0	0	0	1	0	0	0	1	0	0	0	1	0	0	0	0	0	0	0	0	0	1	0	0	0	0	0	0	0	0	0	1	0	1	0	0	0	0	0	0	0	0	0	1	0
Mus_pahari	1	0	0	0	0	0	0	1	0	0	0	1	0	0	0	1	0	0	0	0	0	0	0	0	0	1	0	0	0	1	0	0	0	0	0	1	0	1	0	0	0	0	0	0	0	0	0	1	0
Meriones_unguiculatus	1	0	0	0	0	0	0	0	0	0	0	0	0	0	0	1	0	0	0	0	0	0	0	0	1	1	0	0	0	0	0	0	0	0	0	0	0	0	0	0	0	0	1	0	0	0	0	1	0
Mesocricetus_auratus	1	0	0	0	0	0	0	1	0	0	0	0	0	0	0	1	1	0	0	0	0	0	0	0	1	1	0	0	0	0	0	0	0	0	0	1	0	1	0	0	0	0	0	0	0	0	0	1	0
Cricetulus_griseus	1	0	0	0	0	1	0	1	0	0	0	0	0	0	0	1	0	0	0	0	0	0	0	0	1	1	0	0	1	0	0	0	0	0	0	1	0	1	0	0	0	0	0	0	0	0	0	1	0
Microtus_ochrogaster	1	0	0	0	0	0	1	0	0	0	0	0	0	0	0	1	0	0	0	0	0	0	0	0	1	1	0	0	0	0	0	0	0	0	0	1	0	1	0	0	0	0	0	0	0	0	0	1	1
Peromyscus_maniculatus	1	0	0	0	0	0	0	0	0	0	0	0	0	0	0	1	0	0	0	0	0	0	0	0	1	1	0	0	0	0	0	0	0	0	0	1	0	1	0	0	0	0	0	0	0	0	0	1	0
Nannospalax_galili	1	0	0	0	0	0	0	0	0	0	0	0	0	0	0	1	0	0	0	0	0	0	0	0	1	1	0	0	0	0	0	0	0	0	0	0	0	1	0	1	0	0	0	0	0	0	0	0	0
Jaculus_jaculus	1	0	0	0	0	0	0	0	0	0	1	0	0	0	0	1	0	0	0	0	0	0	0	0	1	1	0	0	0	1	0	0	1	0	0	1	0	0	0	1	0	0	0	0	0	0	0	0	0
Dipodomys_ordii	1	0	0	0	0	0	0	0	0	0	0	0	0	0	0	1	0	0	0	0	0	0	0	0	1	0	0	1	0	0	0	1	0	0	0	1	0	1	0	1	0	0	0	0	1	0	0	1	0
Castor_canadensis	1	0	0	0	0	0	0	1	0	0	0	1	0	0	0	0	0	0	0	0	0	0	1	0	1	0	0	1	0	0	0	0	0	0	0	0	1	1	0	0	0	0	0	0	0	0	0	0	1
Ictidomys_tridecemlineatus	1	0	0	0	0	0	0	0	1	0	0	1	0	0	1	1	0	0	0	0	0	0	0	0	1	0	0	1	1	0	0	0	0	0	0	1	0	1	0	0	0	0	0	0	0	0	0	0	0
Marmota_marmota	1	0	0	0	0	0	0	0	1	0	0	1	0	0	1	1	0	0	0	0	0	0	0	0	1	0	0	1	1	0	0	0	0	0	0	1	0	1	0	0	0	0	0	0	0	0	0	0	0
Otolemur_garnettii	1	0	0	0	0	0	0	0	0	0	0	0	0	1	0	1	0	0	0	0	0	0	0	0	1	0	0	1	0	0	0	0	0	0	1	1	0	0	0	0	0	0	1	0	0	0	1	0	0
Propithecus_coquereli	0	0	0	0	0	0	0	0	0	0	0	0	0	1	0	1	0	0	0	0	0	0	0	0	0	0	0	0	0	0	0	0	0	0	1	1	0	0	0	0	0	0	1	0	0	0	0	0	0
Microcebus_murinus	1	0	0	0	0	0	0	0	0	0	0	0	0	1	1	1	0	0	0	0	0	0	0	0	0	0	1	0	0	0	0	0	1	0	1	0	0	1	0	0	0	0	1	0	0	0	0	0	0
Callithrix_jacchus	1	0	0	0	0	0	0	0	0	0	0	0	0	0	0	0	0	0	0	0	0	0	0	0	0	0	0	0	0	0	0	0	1	0	0	1	0	0	0	0	0	0	0	0	1	0	0	0	0
Aotus_nancymaae	1	0	0	0	0	0	0	0	0	0	0	0	0	0	0	0	0	0	0	0	0	0	0	0	0	0	0	0	0	0	0	0	1	0	0	1	0	0	0	0	0	0	0	0	1	0	0	0	0
Saimiri_boliviensis	1	0	0	0	0	0	0	0	0	0	0	0	0	0	0	0	0	0	0	0	0	0	0	0	1	0	0	0	0	0	0	0	1	0	0	1	0	0	0	0	0	0	0	0	1	0	0	0	0
Cebus_capucinus	1	0	0	0	0	0	0	0	0	0	0	0	0	0	0	0	0	0	0	0	0	0	0	0	0	0	0	0	0	0	0	0	1	0	0	1	0	0	0	0	0	0	0	0	1	0	0	0	0
Mandrillus_leucophaeus	0	0	0	0	0	0	0	0	0	0	0	1	0	0	0	0	0	0	0	0	0	0	0	0	0	0	0	0	0	0	0	0	0	0	0	1	0	0	0	0	0	0	1	0	0	0	0	0	1
Cercocebus_atys	0	0	0	0	0	0	0	0	0	0	0	0	0	0	0	0	0	0	0	0	0	0	0	0	0	0	0	0	0	0	0	0	0	0	0	0	0	0	0	0	0	0	1	0	0	0	0	0	0
Papio_anubis	0	0	0	0	0	0	0	0	0	0	0	0	0	0	0	0	0	0	0	0	0	0	0	0	0	0	0	0	0	0	0	0	0	0	0	0	0	0	0	0	0	0	0	0	0	0	0	0	0
Macaca_mulatta	0	0	0	0	0	0	0	0	0	0	0	0	0	0	0	0	0	0	0	0	0	0	0	0	0	0	0	0	1	0	0	0	0	0	0	0	0	0	0	0	0	0	1	0	0	0	0	0	0
Macaca_fascicularis	0	0	0	0	0	0	0	0	0	0	0	0	0	0	0	0	0	0	0	0	0	0	0	0	0	0	0	0	1	0	0	0	0	0	0	0	0	0	0	0	0	0	1	0	0	0	0	0	0
Macaca_nemestrina	0	0	0	0	0	0	0	0	0	0	0	0	0	0	0	0	0	0	0	0	0	0	0	0	0	0	0	0	1	0	0	0	0	0	0	0	0	0	0	0	0	0	1	0	0	0	0	0	0
Chlorocebus_sabaeus	0	0	0	0	0	0	1	0	0	0	0	0	0	0	0	0	0	0	0	0	0	0	0	0	0	0	0	0	0	0	0	0	0	0	0	0	0	0	0	0	0	0	1	0	0	0	0	0	0
Rhinopithecus_roxellana	1	1	1	1	1	1	1	1	1	1	1	1	1	1	1	1	1	1	1	1	1	1	1	1	1	1	1	1	1	1	1	1	1	1	1	1	1	1	1	1	1	1	1	1	1	1	1	1	1
Rhinopithecus_bieti	1	1	1	1	1	1	1	1	1	1	1	1	1	1	1	1	1	1	1	0	1	1	1	1	0	1	1	1	1	1	1	1	1	1	0	1	1	1	1	1	1	0	0	1	0	1	1	1	1
Piliocolobus_tephrosceles	0	0	1	1	0	0	1	1	0	0	0	0	1	0	0	0	0	1	0	0	0	0	1	0	1	0	1	1	1	0	0	1	1	0	0	1	0	0	0	0	1	0	1	0	0	0	1	0	1
Colobus_angolensis	1	0	1	1	0	0	1	1	0	0	0	0	1	0	0	0	0	1	0	0	0	0	1	0	1	0	1	1	1	0	0	1	1	0	0	1	0	0	0	1	1	0	1	0	0	0	1	0	1
Nomascus_leucogenys	0	0	0	0	0	0	0	0	0	0	0	0	0	0	0	0	0	0	0	0	0	0	0	0	0	0	0	0	0	0	0	0	1	0	0	0	0	0	0	0	0	0	1	0	0	0	0	0	0
Gorilla_gorilla	0	0	0	0	0	0	0	0	0	0	0	0	0	0	0	0	0	0	0	0	0	0	1	0	0	0	0	0	0	0	0	0	1	0	0	0	0	0	0	0	0	0	1	0	0	0	0	0	0
Pan_troglodytes	0	0	0	0	0	0	0	0	0	0	0	0	0	0	0	0	0	0	0	0	0	0	0	0	0	0	0	0	0	0	0	0	1	0	0	0	0	0	0	0	0	0	1	0	0	0	0	0	1
Pan_paniscus	0	0	0	0	0	0	0	0	0	0	0	0	0	0	0	0	0	0	0	0	0	0	0	0	0	0	0	0	0	0	0	0	1	0	0	0	0	0	0	0	0	0	1	0	0	0	0	0	1
Homo_sapiens	0	0	0	0	0	0	0	0	0	0	0	0	0	0	0	0	0	0	0	0	0	0	0	0	0	0	0	0	0	0	0	0	1	0	0	0	0	0	0	0	0	0	1	0	0	0	0	0	0
Pongo_abelii	0	0	0	0	0	0	0	0	0	0	0	0	0	0	0	1	0	0	0	0	0	0	0	0	1	0	0	0	0	0	0	0	0	0	0	0	0	0	0	0	0	0	1	0	0	0	0	0	0
Carlito_syrichta	1	0	0	0	0	0	0	0	0	0	0	0	0	0	0	1	0	0	0	0	0	0	0	0	1	0	0	1	0	0	0	0	1	0	1	1	0	0	0	0	0	0	1	0	0	0	0	0	0
Galeopterus_variegatus	0	0	0	0	0	0	0	0	0	0	0	0	0	1	0	0	0	0	0	0	0	0	0	0	1	0	0	0	0	0	0	0	1	0	0	1	0	0	0	0	0	0	0	0	0	0	0	0	0
Tupaia_belangeri	1	0	0	0	0	0	0	0	0	0	1	0	0	0	0	1	0	0	0	0	0	0	0	0	0	0	0	0	0	0	0	0	0	0	0	0	0	0	0	1	0	0	0	0	0	0	0	0	0
Dasypus_novemcinctus	0	0	0	0	0	0	0	0	0	0	0	0	0	0	0	0	0	0	0	0	0	0	0	0	1	0	0	0	1	0	0	0	1	0	0	0	0	1	0	0	0	0	1	0	1	0	0	0	1
Trichechus_manatus	1	0	0	0	1	0	0	0	0	0	0	0	0	0	1	1	0	0	0	0	0	0	0	0	1	0	0	1	1	0	0	0	1	0	1	0	0	0	0	0	0	0	1	0	0	0	0	0	0
Procavia_capensis	1	0	0	0	0	0	0	0	0	0	0	0	0	0	1	1	0	0	1	0	0	0	0	0	1	0	0	1	1	0	0	0	1	0	0	0	0	0	0	1	0	1	1	1	0	0	0	0	1
Loxodonta_africana	0	0	0	0	0	0	0	0	0	0	0	1	0	0	0	1	0	0	0	0	0	0	0	0	1	0	0	1	1	0	0	0	1	0	0	0	0	0	0	0	0	0	1	0	0	0	0	0	0
Echinops_telfairi	1	0	0	0	0	0	1	0	0	0	0	0	0	0	0	1	0	0	0	0	0	0	0	0	0	0	0	0	1	0	0	0	1	0	0	0	0	0	0	0	0	0	1	0	0	0	0	0	0
Chrysochloris_asiatica	1	0	0	0	0	0	0	0	0	0	1	0	0	0	1	1	0	0	0	0	0	0	0	0	1	0	0	1	0	0	0	1	1	0	0	0	0	0	0	0	0	0	0	0	0	0	0	0	0
Elephantulus_edwardii	1	0	0	0	0	0	0	0	0	0	1	0	0	0	1	1	0	0	1	0	0	0	0	0	0	0	0	1	1	0	0	0	1	0	0	0	0	0	0	0	0	0	0	0	0	0	0	0	0
Orycteropus_afer	1	0	0	0	0	0	0	0	0	0	0	0	0	0	1	1	0	0	0	0	0	0	0	1	1	0	0	1	1	0	0	0	1	0	0	0	0	0	0	0	0	0	1	0	0	0	0	0	0
[truncated: 89 more columns]
